# Supplementary material for: Comparison of British and French expatriate doctors’ characteristics and motivations
Source: PubMed Central journal article supplement — BMJ Open. 2012 Nov 27;2(6):e001706. doi: 10.1136/bmjopen-2012-001706 (PMC3533006; doi:10.1136/bmjopen-2012-001706), 2012-11-27
Supplement: bmjopen-2012-001706.draft_revisions.pdf [file bmjopen-2012-001706.draft_revisions.pdf]

**Comparison of British and French expatriate doctors' characteristics and motivations**

|                                 |                                                                                                                                                                                                                                                                                                                                                                                                                                                                                                                      |
|---------------------------------|----------------------------------------------------------------------------------------------------------------------------------------------------------------------------------------------------------------------------------------------------------------------------------------------------------------------------------------------------------------------------------------------------------------------------------------------------------------------------------------------------------------------|
| Journal:                        | <i>BMJ Open</i>                                                                                                                                                                                                                                                                                                                                                                                                                                                                                                      |
| Manuscript ID:                  | bmjopen-2012-001706                                                                                                                                                                                                                                                                                                                                                                                                                                                                                                  |
| Article Type:                   | Research                                                                                                                                                                                                                                                                                                                                                                                                                                                                                                             |
| Date Submitted by the Author:   | 05-Jul-2012                                                                                                                                                                                                                                                                                                                                                                                                                                                                                                          |
| Complete List of Authors:       | Quantin, Catherine; Centre Hospitalier Universitaire, Service de Biostatistique et Informatique Médicale<br>Abbas, Rachid; Centre Hospitalier Universitaire, Service de Biostatistique et Informatique Médicale<br>Hagi, Mathieu; Centre Hospitalier Universitaire, Service de Biostatistique et Informatique Médicale<br>LE BRETON, Gwenaelle; Conseil National de l'Ordre des Médecins,<br>Romestaing, M; Conseil National de l'Ordre des Médecins,<br>Carnet, Dider; Faculté de Médecine, Université de Bourgogne |
| <b>Primary Subject Heading</b>: | Medical education and training                                                                                                                                                                                                                                                                                                                                                                                                                                                                                       |
| Secondary Subject Heading:      | Medical education and training                                                                                                                                                                                                                                                                                                                                                                                                                                                                                       |
| Keywords:                       | MEDICAL EDUCATION & TRAINING, PUBLIC HEALTH, SOCIAL MEDICINE                                                                                                                                                                                                                                                                                                                                                                                                                                                         |
|                                 |                                                                                                                                                                                                                                                                                                                                                                                                                                                                                                                      |

SCHOLARONE™  
Manuscripts

## Comparison of British and French expatriate doctors' characteristics and motivations

Short title: Why do British and French MDs cross the Channel?

C. QUANTIN<sup>1, 2</sup>, R. ABBAS<sup>1</sup>, M. HAGI<sup>1</sup>, G. LE BRETON<sup>2</sup>, M. ROMESTAING<sup>2</sup>, D. CARNET<sup>3</sup>

1. Service de Biostatistique et Informatique Médicale, CHU de Dijon
2. INSERM U 866 Université de Bourgogne
3. Conseil National de l'Ordre des Médecins, Paris, France
4. Faculté de Médecine, Université de Bourgogne

### Corresponding author :

Professeur Catherine QUANTIN

Service de Biostatistique et Informatique Médicale

Centre Hospitalier Universitaire

BP 77908

21079 DIJON CEDEX

Tel: 33 3 80 29 36 29

Fax: 33 3 80 29 39 73

Email: [catherine.quantin@chu-dijon.fr](mailto:catherine.quantin@chu-dijon.fr)

**Key words:** Medical Emigration, Great Britain, Recruitment, Health System, France

1  
2  
3 ABSTRACT  
4

5 Objective: to analyse the migration of doctors between the United Kingdom and France,  
6  
7 in an attempt to identify the reasons for these migrations.  
8

9 Design: This was a cross-sectional study conducted using a self-completed  
10  
11 questionnaire.  
12

13 Setting: The questionnaire was sent to all of the British doctors practicing in France and  
14  
15 to all of the French doctors practicing in the United Kingdom.  
16

17 Participants: The doctors were identified thanks to official data of the National Medical  
18  
19 Councils. There were 244 French doctors practicing in the United Kingdom and 86 British  
20  
21 doctors practicing in France.  
22  
23

24 Outcome measures: A questionnaire was specifically developed for the study to  
25  
26 determine the reasons why doctors moved to the other country and their level of satisfaction  
27  
28 with regard to their expatriation.  
29  
30

31 Results: A total of 98 French doctors (out of 244) and 40 British doctors (out of 86)  
32  
33 returned the questionnaire. The motivations of the two studied populations were different:  
34  
35 French doctors were attracted by the conditions offered by the National Health Service,  
36  
37 whereas British doctors were more interested in opportunities for career advancement, moved  
38  
39 to join a husband or wife or to benefit from favourable environmental conditions. Overall, the  
40  
41 doctors who responded considered the expatriation a satisfactory experience. After  
42  
43 expatriation, 84% of French doctors were satisfied with their new professional situation  
44  
45 compared with only 58% of British doctors.  
46  
47  
48

49 Conclusion: This study, which is the first of its kind and based on representative  
50  
51 samples, has led to a clearer understanding of the migration of doctors between France and  
52  
53 the United Kingdom.  
54  
55

## I – INTRODUCTION

Medical migration is an important issue that needs to be understood so that it can be regulated collectively, while allowing individuals to benefit from it.

Doctors are highly qualified workers, and their migration follows known migration patterns for qualified people, often referred to as the ‘brain drain’. The principal reasons for emigration are obvious (1): improvement in quality of life (higher level of security, increase in revenue ...) and their career prospects.

Migrating doctors follow what could be called a hierarchy of wealth: they migrate towards a country that is likely to offer them a better situation than that available in their country of residence (2, 3). This phenomenon is called the migration merry-go-round or the migration pyramid. For example, Zambian doctors emigrate to South Africa, while South African doctors emigrate to the United Kingdom and British doctors emigrate to Canada, which in turn sees some of its doctors head for the United States. The United States seems to be at the summit of this pyramid; it’s the only country that has a positive balance ((4)) with regard to the migratory flow of healthcare professionals. However, medical migration is not simply the flow from developing countries to more developed countries; it also involves movement between developed countries (5-7).

The United Kingdom health system has always been, and continues to be, largely reliant on immigrants. Foreign-trained medical doctors accounted for 36.8% of all registered medical doctors in 2008, around one-quarter of whom came from the EEA and three-quarters from the rest of the world. In France, immigration of medical doctors has only a marginal impact. It does not solve the difficulties of poor geographical distribution, which is a characteristic of

1  
2  
3 the French health system as there are no obligations but only incentives to set up a practice in  
4  
5 isolated areas.

6  
7  
8 Though migration between developing and developed countries is well known, that between  
9  
10 developed countries is not. The search for an improvement in lifestyle or career prospects is  
11  
12 not the only parameter in the choice of destination. Cultural or historical links between the  
13  
14 two countries or geographical proximity can also play a role in the decision. This is why we  
15  
16 decided to study the migratory flow of doctors between the United Kingdom and France in an  
17  
18 attempt to identify the precise reasons for these migrations.  
19

## 20 21 22 23 II - MATERIALS and METHODS 24

25  
26  
27  
28 We conducted a cross-sectional study on the migration of doctors between France and the  
29  
30 United Kingdom. This study was organised in two parts: we asked doctors trained in France  
31  
32 and those trained in the United Kingdom about the reasons behind the decision to expatriate.  
33  
34 We used official data from the Medical Councils of Britain and France to establish our list of  
35  
36 doctors. These councils are required to create and keep an up-to-date record of all of the  
37  
38 medical doctors authorized to practice medicine. In the first part, doctors who had trained in  
39  
40 France before moving to the United Kingdom to practice were identified thanks to the register  
41  
42 of the General Medical Council (GMC) in 2005. The results of this first part as well as the  
43  
44 methods and the questionnaire used have already been published (8, 9). The second part of the  
45  
46 study concerned British doctors registered with the French ‘Conseil National de l’Ordre des  
47  
48 Médecins’ (CNOM) in 2009. In addition, the CNOM have socio-demographic data for all of  
49  
50 the doctors registered, which allowed us to conduct a descriptive analysis of all of the doctors  
51  
52 concerned and to assess the representativeness of the sample of respondents.  
53  
54  
55  
56

1  
2  
3 Doctors who qualified before moving to either the United Kingdom or France were asked to  
4  
5 complete a questionnaire about the reasons for their decision to migrate. The demographic  
6  
7 characteristics and the reasons for their expatriation were gathered via a self-completed  
8  
9 questionnaire that contained the same items for the two populations; it was based on the study  
10  
11 by Ballard and al. published in 2004 (10).  
12

13  
14 The questionnaire comprises various parts: a description of the professional situation, an  
15  
16 assessment of the level of professional and personal satisfaction before and after the departure  
17  
18 (evaluated on a scale of 1 for very dissatisfied to 5 for very satisfied), questions concerning  
19  
20 the motivations behind the expatriation (with pre-defined options), the estimated duration of  
21  
22 the expatriation and the likelihood of a change of nationality. The questionnaires were  
23  
24 anonymous. They were sent through the post. Data from the questionnaires were entered  
25  
26 anonymously into a database.  
27  
28  
29  
30  
31

## 32 RESULTS

33  
34  
35

36 The questionnaire was sent to the 264 doctors registered as French by the GMC in 2005; we  
37  
38 received 98 responses. As 20 questionnaires were returned because the address was incorrect,  
39  
40 the overall response rate was roughly 40% (98 out of 244). From the 86 British doctors  
41  
42 working in France and registered with the CNOM, we received 40 responses, that is to say  
43  
44 46.5%. As in the first study, 14 completed questionnaires were returned by British doctors  
45  
46 who had not done all of their medical studies in the United Kingdom. These questionnaires  
47  
48 were not taken into account for the motivation analysis. We found no significant difference  
49  
50 (chi-squared comparison test's p-value=0.52) in the proportion of British doctors who had not  
51  
52 done all of their medical studies in the United Kingdom between our sample of respondent  
53  
54  
55  
56  
57

1  
2  
3 (33%) and the CNOM's data (39%); we therefore assume that our sample of respondents is  
4 rather representative.  
5

6  
7 Sex distribution in the two populations was well balanced (Figure 1) with a trend towards a  
8 greater proportion of women in the British expatriates (sex-ratio 0.95 for French vs. 0.85 for  
9 British doctors). The mean age was 47 years for British and 44 years for French doctors. In  
10 both populations we found a majority of women in younger doctors (less than 50 years) and a  
11 majority of men among older doctors.  
12

13  
14 The doctors who answered the questionnaires believed they were proficient in the foreign  
15 language. Only 19% of French doctors and 11% of British doctors said that they were weak in  
16 the foreign language before the expatriation. In addition, language did not seem to be an  
17 obstacle to expatriation since even those who had a low level in the foreign language did not  
18 wish to have language lessons after the expatriation.  
19

20  
21 The two populations included a wide range of specialists (Table 1). The proportion of general  
22 practitioners (GPs) was high in both groups, 48% for the French and 41% for the British  
23 expatriate doctors (41%). The majority of GPs were women in the two populations: 58% of  
24 French GPs and 57% of British GPs.  
25

26  
27 In the two populations, the expatriation occurred at roughly the same period in the career. The  
28 French doctors had been in practice for an average of eight years compared with nine years  
29 for the British doctors.  
30

31  
32 Before expatriation, only 32% of French doctors had worked in the public sector whereas  
33 there were 67% of British doctors. After expatriation, the majority of French doctors (68%)  
34 opted for the public sector, and the majority of British doctors (67%) remained in the public  
35 sector.  
36

37  
38 We found three main reasons for expatriation: expatriation for personal reasons, expatriation  
39 for professional reasons and expatriation for a combination of professional and personal  
40 reasons.  
41

42  
43  
44  
45  
46  
47  
48  
49  
50  
51  
52  
53  
54  
55  
56  
57  
58  
59  
60

1  
2  
3 reasons. In both groups, the reasons were predominantly mixed (Figure 2), but were  
4  
5 considerably different. The majority of French doctors (59%) and the majority of British  
6  
7 doctors (65%) said they moved for professional and family reasons. For the French doctors,  
8  
9 professional reasons were put at the forefront and were principally an increase in revenue (11)  
10  
11 and an improvement in working conditions and better recognition with regard to both research  
12  
13 and training. Also in this group, personal reasons were first the appeal of the British way of  
14  
15 life and then family reasons. For the British doctors, the main professional reasons were the  
16  
17 interest of a new position with an opportunity for career advancement and dissatisfaction with  
18  
19 working conditions in the United Kingdom, which prevented them from reconciling their  
20  
21 professional and personal lives, notably for those with a spouse in France. In this group the  
22  
23 main personal reasons were family reasons followed by the appeal of the French way of life.  
24  
25 Only 12% of French doctors and 4% of British doctors moved for professional reasons alone.  
26  
27 These doctors were mainly men over 40 who were seeking an increase in revenue. Twenty-  
28  
29 nine per cent of French doctors and 31% of British doctors moved for family reasons alone.  
30  
31 Almost all of these moves were made to join a husband or wife.  
32  
33  
34  
35

36 Overall, the doctors who returned the questionnaires were satisfied with the expatriation  
37  
38 (mean level of satisfaction 4/5).  
39

40 Before the expatriation, the proportion of doctors who were satisfied or very satisfied with  
41  
42 their professional situation was greater in the British doctors (54%) than in the French doctors  
43  
44 (41%) (Figure 3). After expatriation, the proportions were inverted: 84% of French doctors  
45  
46 were satisfied or very satisfied with their new professional situation compared with 57% of  
47  
48 British doctors. The change in the level of satisfaction for each doctor allowed us to assess the  
49  
50 gains brought about by the expatriation. From a professional point of view, 54% of French  
51  
52 doctors and 50% of British doctors believed that the expatriation allowed them to obtain a  
53  
54 more satisfying position. Nonetheless, 12% of French doctors and 19% of British doctors  
55  
56  
57  
58  
59  
60

1  
2  
3 experienced a deterioration in satisfaction at work. From a personal point of view, the British  
4  
5 doctors were generally satisfied. In fact, most of the British doctors planned to settle in France  
6  
7 on a permanent basis (more than 10 years or indefinitely), even though 73% did not wish to  
8  
9 apply for French nationality. The majority of British doctors settled in coastal areas of the  
10  
11 south of France or in or around Paris (Figure 4).  
12

## 13 14 15 16 DISCUSSION

17  
18  
19  
20 This study allowed us to identify the principal features of the migration of doctors between  
21  
22 Britain and France. Among these expatriates, there are almost as many men as women, with a  
23  
24 slight majority of women in doctors less than 50 years old and a majority of men in the older  
25  
26 doctors. There were doctors specialized in most branches of medicine and GPs accounted for  
27  
28 almost half of the total. The motivation for the expatriation was mainly a mixture of  
29  
30 professional and personal reasons. For French doctors, the principal professional reasons were  
31  
32 an increase in revenue and an improvement in working conditions, while the main personal  
33  
34 reason was the appeal of the British way of life. For British doctors, the foremost professional  
35  
36 reason was the interest of the new position and an opportunity for career advancement, while  
37  
38 the main personal reason was to join another family member.  
39  
40  
41

42  
43 Overall, the doctors were satisfied with their move (mean level of satisfaction 4/5). However,  
44  
45 the reasons for the satisfaction for British doctors were not the same as those for French  
46  
47 doctors. For British doctors the satisfaction was essentially for personal reasons whereas for  
48  
49 French doctors it was essentially for professional reasons. In fact, after expatriation, 84% of  
50  
51 French doctors were satisfied with their new professional situation compared with only 58%  
52  
53 of British doctors. Almost 20% of British doctors experienced a deterioration in their level of  
54  
55 satisfaction at work.  
56

57  
58  
59  
60  
8

1  
2  
3 Nonetheless, most of the British doctors planned to settle in France for a long time and in  
4  
5 some cases definitively. Furthermore, the analysis of the distribution of British doctors around  
6  
7 France showed that they were particularly attracted to coastal areas of the south of France and  
8  
9 the Paris area, which could be interpreted as follows: British doctors could be drawn to France  
10  
11 either to join a partner or because of the favourable climate.  
12

13  
14 In this study, the response rates were 40% and 40.6%, which may seem low. Nonetheless,  
15  
16 these rates are relatively good when compared with response rates usually achieved in opinion  
17  
18 surveys conducted among doctors which can range from 12.4% for Watson J et al. (12) to  
19  
20 53% for Whalley et al. (13) In addition, the present study made use of official databases run  
21  
22 by the Medical Councils of Britain and France which are required by law to guarantee the  
23  
24 accuracy of these registers. Thanks to the official CNOM's registration data, it was possible  
25  
26 for us to compare the characteristics of the UK doctors in our study with those on the file  
27  
28 provided by the CNOM. This comparison allowed us to show that our sample was  
29  
30 representative and that our estimation of the response of British doctors who moved to France  
31  
32 was accurate. In addition, as shown by Sax L.J. et al (14), the self-questionnaire has several  
33  
34 advantages. It reduces the risk of both memory bias and interviewer bias.  
35  
36

37  
38 Another strength of this study lies in the fact that it allowed us to analyse the migration of  
39  
40 doctors between developed countries. Indeed, most of the studies on this subject concern the  
41  
42 migration of doctors from developing to developed countries (15). The main reasons why  
43  
44 doctors migrate from developing to developed countries can be described by the "push and  
45  
46 pull" concept (16-19). The term 'push' corresponds to factors that are inherent to the country  
47  
48 of origin, which push workers to leave (low salaries, political instability and insecurity). In  
49  
50 contrast, the term 'pull' brings together factors that are inherent to the country of destination,  
51  
52 whether intentional or not, that attract foreign workers (better pay, better pension schemes). In  
53  
54 this study, no clear-cut "push" factors were found, which shows that the migration of doctors  
55  
56  
57  
58  
59  
60

1  
2  
3 between the UK and France is driven by other factors. As shown by several studies (7, 20,  
4  
5 21), for European doctors as a whole, both the United Kingdom and France are attractive  
6  
7 destinations. Moreover, since 2004, EU enlargement has favored the inflow of medical  
8  
9 doctors from new member countries ((22, 23) Unlike the United Kingdom (24), France has no  
10  
11 active policy and no advertising campaigns to recruit foreign doctors. Despite this, our study  
12  
13 shows that a substantial number of UK doctors, who studied in the UK, have moved to  
14  
15 France. In addition, the level of satisfaction after the move, revealed in this study, seems to  
16  
17 show that they were well received. It is therefore interesting to note the extent to which our  
18  
19 results differ from those reported by Miller et al (25) concerning Australian and New-Zealand  
20  
21 doctors who moved to the USA. The vast majority (more than 82%) of these doctors was men  
22  
23 and most were specialists (75%) drawn by university positions. The motivations of these  
24  
25 doctors therefore seem to be very different from those of UK and French doctors. One of the  
26  
27 reasons for this difference could be linked to the vigorous recruitment policy in the USA  
28  
29 reinforced by very attractive salaries. It therefore seems that for doctors working in developed  
30  
31 countries, beyond the classical paradigm of the migration pyramid, the reasons for  
32  
33 expatriation are related to quite specific local issues that vary from country to country.  
34  
35  
36  
37  
38  
39

## 40 CONCLUSION

41  
42  
43  
44  
45 This study, which is the first of its kind and based on representative samples, has led to a  
46  
47 clearer understanding of the migration of doctors between France and the United Kingdom. It  
48  
49 showed that the motivations of the two populations concerned are quite different: French  
50  
51 doctors are more interested in the health care system, notably the National Health Service  
52  
53 (NHS) whereas British doctors are more interested in opportunities for career advancement, or  
54  
55 move to join a husband or wife, or to benefit from a favourable environmental conditions,  
56  
57  
58  
59  
60

1  
2  
3 notably warmer weather in the south of France. The British health care system is very  
4  
5 appealing to French doctors, especially GPs, for whom the NHS presents the advantages of  
6  
7 easier management of work time, better income and better recognition with regard to both  
8  
9 research and training. The NHS is also able to retain British doctors since very few said they  
10  
11 left Britain for professional reasons alone, and once British doctors had settled in France, a  
12  
13 large number said they were less satisfied with their professional life. Nonetheless, overall the  
14  
15 doctors who returned the questionnaire were globally satisfied with their expatriation.  
16  
17  
18  
19  
20  
21  
22  
23  
24  
25  
26  
27  
28  
29  
30  
31  
32  
33  
34  
35  
36  
37  
38  
39  
40  
41  
42  
43  
44  
45  
46  
47  
48  
49  
50  
51  
52  
53  
54  
55  
56  
57  
58  
59  
60

## References:

1. Martineau T, Decker K, Bundred P. "Brain drain" of health professionals: from rhetoric to responsible action. *Health Policy*. 2004 Oct;70(1):1-10.
2. Bundred PE, Levitt C. Medical migration: who are the real losers? *Lancet*. 2000 Jul 15;356(9225):245-6.
3. Marchal B, Kegels G. Health workforce imbalances in times of globalization: brain drain or professional mobility? *Int J Health Plann Manage*. 2003 Oct-Dec;18 Suppl 1:S89-101.
4. Mullan F. The metrics of the physician brain drain. *N Engl J Med*. 2005 Oct 27;353(17):1810-8.
5. Claudia BM, editor. Cross-country analysis of health professional mobility in Europe: the results. *Health Professional Mobility and Health Systems – Evidence from 17 European countries*; 2011.
6. Ferrera M. The 'Southern Model' of Welfare in Social Europe. *Journal of European Social Policy* 1996;6(1):17-37.
7. Wismar M, Glinos IA, Maier CB, Dussault G, Palm W, Bremner J, et al., editors. Health professional mobility and health systems: evidence from 17 European countries. *Euro Observer The Health Policy Bulletin of the European Observatory on Health Systems and Policies* 2011 Summer 2011.
8. Dobson R. Four out of five doctors who emigrate from France to UK satisfied with move. *BMJ*. 2008;337:a2708.
9. Duverne A, Carnet D, d'Athis P, Quantin C. [French doctors working in Great Britain: a study of their characteristics and motivations for migration]. *Rev Epidemiol Sante Publique*. 2008 Oct;56(5):360-73.
10. Ballard KD, Robinson SI, Laurence PB. Why do general practitioners from France choose to work in London practices? A qualitative study. *Br J Gen Pract*. 2004 Oct;54(507):747-52.
11. Samson AL. Behavior of health care provision and income of GPs: the influence of the regulation of ambulatory medicine. *Journal d'Economie Medicale*. 2011;29(5):247-69.
12. Watson J, Humphrey A, Peters-Klimm F, Hamilton W. Motivation and satisfaction in GP training: a UK cross-sectional survey. *Br J Gen Pract*. 2011 Oct;61(591):e645-9.
13. Whalley D, Bojke C, Gravelle H, Sibbald B. GP job satisfaction in view of contract reform: a national survey. *Br J Gen Pract*. 2006 Feb;56(523):87-92.
14. Sax LJ, Gilmartin SK, Bryant AN. Assessing Response Rates and Nonresponse Bias in Web and Paper Surveys. *Research in Higher Education*. 2004;4:409-32.
15. Kangasniemi M, Winters LA, Commander S. Is the medical brain drain beneficial? Evidence from overseas doctors in the UK. *Soc Sci Med*. 2007 Sep;65(5):915-23.
16. Dovlo D, editor. The Brain Drain and Retention of Health Professionals in Africa. A case study prepared for a Regional Training Conference on: Improving Tertiary Education in Sub-Saharan Africa: Things That Work! ; 2003 September 23-25, 2003; Accra.
17. Eastwood JB, Conroy RE, Naicker S, West PA, Tutt RC, Plange-Rhule J. Loss of health professionals from sub-Saharan Africa: the pivotal role of the UK. *Lancet*. 2005 May 28-Jun 3;365(9474):1893-900.

1  
2  
3  
4  
5  
6  
7  
8  
9  
10  
11  
12  
13  
14  
15  
16  
17  
18  
19  
20  
21  
22  
23  
24  
25  
26  
27  
28  
29  
30  
31  
32  
33  
34  
35  
36  
37  
38  
39  
40  
41  
42  
43  
44  
45  
46  
47  
48  
49  
50  
51  
52  
53  
54  
55  
56  
57  
58  
59  
60

18. Klein D, Hofmeister M, Lockyear J, Crutcher R, Fidler H. Push, pull, and plant: the personal side of physician immigration to alberta, Canada. *Fam Med.* 2009 Mar;41(3):197-201.

19. Witt J. Addressing the migration of health professionals: the role of working conditions and educational placements. *BMC Public Health.* 2009;9 Suppl 1:S7.

For peer review only

Footnotes

Contributorship statement: CQ and DC were responsible for the conception and design of this study. GLB and MR provided the data. MH, CQ, and RA analysed the data. CQ, RA and DC wrote the manuscript. MH contributed to the initial revision of the manuscript. All authors were involved in approval of the final manuscript. All authors had full access to all of the data in the study and can take responsibility for the integrity of the data and the accuracy of the data analysis. CQ is guarantor.

Competing interest: All authors have completed the Unified Competing Interest form at [www.icmje.org/coi\\_disclosure.pdf](http://www.icmje.org/coi_disclosure.pdf) (available on request from the corresponding author) and declare: no support from any organisation for the submitted work; no financial relationships with any organisations that might have an interest in the submitted work in the previous three years; no other relationships or activities that could appear to have influenced the submitted work.

Ethical approval: Not required.

Funding: This study received no specific funding.

Data sharing: there is no additional data available.

Summary:

What is already known on this subject

The main reasons why doctors migrate from developing to developed countries can be described by the “push and pull” concept

Though migration between developing and developed countries is well known, that between developed countries and especially between France and the United Kingdom is not

1  
2  
3 What this study adds  
4

5 It is the first study to analyse both jointly and bilaterally reasons why doctors move from  
6  
7 France to the United Kingdom or vice versa.  
8

9  
10 The British health care system is very appealing to French doctors, especially GPs, for whom  
11  
12 the NHS presents the advantages of easier management of work time, better income and better  
13  
14 recognition with regard to both research and training  
15

16 British doctors who moved to France are more interested in opportunities for career  
17  
18 advancement, or move to join a husband or wife, or to benefit from favourable environmental  
19  
20 conditions, notably warmer weather in the south of France  
21  
22  
23  
24  
25  
26  
27  
28  
29  
30  
31  
32  
33  
34  
35  
36  
37  
38  
39  
40  
41  
42  
43  
44  
45  
46  
47  
48  
49  
50  
51  
52  
53  
54  
55  
56  
57  
58  
59  
60

1  
2  
3 Legends  
4  
5  
6

7 Figure 1. Age pyramid  
8

9 Figure 2. Motivation for expatriation in French and British doctors.  
10

11 Figure 3. Level of satisfaction with professional life before and after expatriation  
12

13 Figure 4. Geographical distribution of British doctors with a steady medical practice  
14  
15  
16  
17  
18  
19  
20  
21  
22  
23  
24  
25  
26  
27  
28  
29  
30  
31  
32  
33  
34  
35  
36  
37  
38  
39  
40  
41  
42  
43  
44  
45  
46  
47  
48  
49  
50  
51  
52  
53  
54  
55  
56  
57  
58  
59  
60

For peer review only

|                    | French expatriate<br>doctors in Great Britain<br>(percentage) | British expatriate doctors<br>in France<br>(percentage) |
|--------------------|---------------------------------------------------------------|---------------------------------------------------------|
| GPs                | 48                                                            | 60                                                      |
| Medical speciality | 22                                                            | 14                                                      |
| Psychiatrist       | 6                                                             | 9                                                       |
| Anaesthetist       | 9                                                             | 7                                                       |
| Surgical specialty | 7                                                             | 4                                                       |
| Paediatrician      | 3                                                             | 1                                                       |
| OB-GYN             | 1                                                             | 1                                                       |
| Others             | 4                                                             | 4                                                       |
| Total              | 100%                                                          | 100%                                                    |

Table 1. Distribution of doctors according to medical specialty.

1  
2  
3  
4  
5  
6  
7  
8  
9  
10  
11  
12  
13  
14  
15  
16  
17  
18  
19  
20  
21  
22  
23  
24  
25  
26  
27  
28  
29  
30  
31  
32  
33  
34  
35  
36  
37  
38  
39  
40  
41  
42  
43  
44  
45  
46  
47  
48  
49  
50  
51  
52  
53  
54  
55  
56  
57  
58  
59  
60



209x297mm (150 x 150 DPI)

1  
2  
3  
4  
5  
6  
7  
8  
9  
10  
11  
12  
13  
14  
15  
16  
17  
18  
19  
20  
21  
22  
23  
24  
25  
26  
27  
28  
29  
30  
31  
32  
33  
34  
35  
36  
37  
38  
39  
40  
41  
42  
43  
44  
45  
46  
47  
48  
49  
50  
51  
52  
53  
54  
55  
56  
57  
58  
59  
60



209x297mm (150 x 150 DPI)

1  
2  
3  
4  
5  
6  
7  
8  
9  
10  
11  
12  
13  
14  
15  
16  
17  
18  
19  
20  
21  
22  
23  
24  
25  
26  
27  
28  
29  
30  
31  
32  
33  
34  
35  
36  
37  
38  
39  
40  
41  
42  
43  
44  
45  
46  
47  
48  
49  
50  
51  
52  
53  
54  
55  
56  
57  
58  
59  
60



209x297mm (150 x 150 DPI)

1  
2  
3  
4  
5  
6  
7  
8  
9  
10  
11  
12  
13  
14  
15  
16  
17  
18  
19  
20  
21  
22  
23  
24  
25  
26  
27  
28  
29  
30  
31  
32  
33  
34  
35  
36  
37  
38  
39  
40  
41  
42  
43  
44  
45  
46  
47  
48  
49  
50  
51  
52  
53  
54  
55  
56  
57  
58  
59  
60



222x128mm (96 x 96 DPI)

review only

1  
2  
3 Contributorship statement: CQ and DC were responsible for the conception and design of this  
4  
5 study. GLB and MR provided the data. MH, CQ, and RA analysed the data. CQ, RA and DC  
6  
7 wrote the manuscript. MH contributed to the initial revision of the manuscript. All authors  
8  
9 were involved in approval of the final manuscript. All authors had full access to all of the data  
10  
11 in the study and can take responsibility for the integrity of the data and the accuracy of the  
12  
13 data analysis. CQ is guarantor.  
14  
15  
16  
17  
18  
19  
20  
21  
22  
23  
24  
25  
26  
27  
28  
29  
30  
31  
32  
33  
34  
35  
36  
37  
38  
39  
40  
41  
42  
43  
44  
45  
46  
47  
48  
49  
50  
51  
52  
53  
54  
55  
56  
57  
58  
59  
60

1  
2  
3  
4  
5  
6  
7  
8  
9  
10  
11  
12  
13  
14  
15  
16  
17  
18  
19  
20  
21  
22  
23  
24  
25  
26  
27  
28  
29  
30  
31  
32  
33  
34  
35  
36  
37  
38  
39  
40  
41  
42  
43  
44  
45  
46  
47  
48  
49  
50  
51  
52  
53  
54  
55  
56  
57  
58  
59  
60

Data sharing: there is no additional data available.

For peer review only

Funding: This study received no specific funding.

For peer review only



### Comparison of British and French expatriate doctors' characteristics and motivations

|                                 |                                                                                                                                                                                                                                                                                                                                                                                                                                                                                                                      |
|---------------------------------|----------------------------------------------------------------------------------------------------------------------------------------------------------------------------------------------------------------------------------------------------------------------------------------------------------------------------------------------------------------------------------------------------------------------------------------------------------------------------------------------------------------------|
| Journal:                        | <i>BMJ Open</i>                                                                                                                                                                                                                                                                                                                                                                                                                                                                                                      |
| Manuscript ID:                  | bmjopen-2012-001706.R1                                                                                                                                                                                                                                                                                                                                                                                                                                                                                               |
| Article Type:                   | Research                                                                                                                                                                                                                                                                                                                                                                                                                                                                                                             |
| Date Submitted by the Author:   | 11-Sep-2012                                                                                                                                                                                                                                                                                                                                                                                                                                                                                                          |
| Complete List of Authors:       | Quantin, Catherine; Centre Hospitalier Universitaire, Service de Biostatistique et Informatique Médicale<br>Abbas, Rachid; Centre Hospitalier Universitaire, Service de Biostatistique et Informatique Médicale<br>Hagi, Mathieu; Centre Hospitalier Universitaire, Service de Biostatistique et Informatique Médicale<br>LE BRETON, Gwenaelle; Conseil National de l'Ordre des Médecins,<br>Romestaing, M; Conseil National de l'Ordre des Médecins,<br>Carnet, Dider; Faculté de Médecine, Université de Bourgogne |
| <b>Primary Subject Heading</b>: | Medical education and training                                                                                                                                                                                                                                                                                                                                                                                                                                                                                       |
| Secondary Subject Heading:      | Sociology, Health economics                                                                                                                                                                                                                                                                                                                                                                                                                                                                                          |
| Keywords:                       | MEDICAL EDUCATION & TRAINING, PUBLIC HEALTH, SOCIAL MEDICINE                                                                                                                                                                                                                                                                                                                                                                                                                                                         |
|                                 |                                                                                                                                                                                                                                                                                                                                                                                                                                                                                                                      |

SCHOLARONE™  
Manuscripts

1  
2  
3  
4  
5  
6  
7 **Comparison of British and French expatriate doctors' characteristics and motivations**  
8  
9

10 Short title: Why do British and French MDs cross the Channel?  
11

12  
13  
14 C. QUANTIN<sup>1, 2</sup>, R. ABBAS<sup>1</sup>, M. HAGI<sup>1</sup>, G. LE BRETON<sup>2</sup>, M. ROMESTAING<sup>2</sup>, D.  
15 CARNET<sup>3</sup>  
16

- 17  
18  
19  
20 1. Service de Biostatistique et Informatique Médicale, CHU de Dijon  
21  
22 2. INSERM U 866 Université de Bourgogne  
23  
24 3. Conseil National de l'Ordre des Médecins, Paris, France  
25  
26 4. Faculté de Médecine, Université de Bourgogne  
27  
28  
29  
30  
31

32 **Corresponding author :**

33 Professeur Catherine QUANTIN

34 Service de Biostatistique et Informatique Médicale

35 Centre Hospitalier Universitaire

36 BP 77908

37 21079 DIJON CEDEX

38 Tel: 33 3 80 29 36 29

39 Fax: 33 3 80 29 39 73

40 Email: catherine.quantin@chu-dijon.fr  
41  
42  
43  
44  
45  
46  
47  
48  
49  
50

51 **Key words:** Medical Emigration, Great Britain, Recruitment, Health System, France  
52  
53

54 1  
55  
56  
57  
58  
59  
60

1  
2  
3  
4  
5  
6  
7 ABSTRACT

8 Objective: to analyse the migration of doctors between the United Kingdom and France,  
9 in an attempt to identify the reasons for these migrations.

10  
11 Design: This was a cross-sectional study conducted using a self-completed  
12 questionnaire.  
13

14  
15 Setting: The questionnaire was sent to all of the British doctors practicing in France and  
16 to all of the French doctors practicing in the United Kingdom.  
17

18  
19 Participants: The doctors were identified thanks to official data of the National Medical  
20 Councils. There were 244 French doctors practicing in the United Kingdom and 86 British  
21 doctors practicing in France.  
22

23  
24 Outcome measures: A questionnaire was specifically developed for the study to  
25 determine the reasons why doctors moved to the other country and their level of satisfaction  
26 with regard to their expatriation.  
27

28  
29 Results: A total of 98 French doctors (out of 244) and 40 British doctors (out of 86)  
30 returned the questionnaire. The motivations of the two studied populations were different:  
31 French doctors were attracted by the conditions offered by the National Health Service,  
32 whereas British doctors were more interested in opportunities for career advancement, moved  
33 to join a husband or wife or to benefit from favourable environmental conditions. Overall, the  
34 doctors who responded considered the expatriation a satisfactory experience. After  
35 expatriation, 84% of French doctors were satisfied with their new professional situation  
36 compared with only 58% of British doctors.  
37

38  
39 Conclusion: This study, which is the first of its kind and based on representative  
40 samples, has led to a clearer understanding of the migration of doctors between France and  
41 the United Kingdom.  
42

43  
44  
45  
46  
47  
48  
49  
50  
51  
52  
53  
54 2  
55  
56  
57  
58  
59  
60

## I – INTRODUCTION

Medical migration is an important issue that needs to be understood so that it can be regulated collectively, while allowing individuals to benefit from it.

Doctors are highly qualified workers, and their migration follows known migration patterns for qualified people, often referred to as the ‘brain drain’. The principal reasons for emigration are obvious (1): improvement in quality of life (higher level of security, increase in revenue ...) and their career prospects.

Migrating doctors follow what could be called a hierarchy of wealth: they migrate towards a country that is likely to offer them a better situation than that available in their country of residence (2, 3). This phenomenon is called the migration merry-go-round or the migration pyramid. For example, Zambian doctors emigrate to South Africa, while South African doctors emigrate to the United Kingdom and British doctors emigrate to Canada, which in turn sees some of its doctors head for the United States. The United States seems to be at the summit of this pyramid; it’s the only country that has a positive balance ((4)) with regard to the migratory flow of healthcare professionals. However, medical migration is not simply the flow from developing countries to more developed countries; it also involves movement between developed countries (5-7).

The United Kingdom health system has always been, and continues to be, largely reliant on immigrants. Foreign-trained medical doctors accounted for 36.8% of all registered medical doctors in 2008, around one-quarter of whom came from the EEA ([European Economic Area](#)) and three-quarters from the rest of the world. In France, immigration of medical doctors has only a marginal impact. It does not solve the difficulties of poor geographical distribution,

1  
2  
3  
4  
5  
6  
7 which is a characteristic of the French health system as there are no obligations but only  
8 incentives to set up a practice in isolated areas.  
9

10  
11 Though migration between developing and developed countries is well known, that between  
12 developed countries is not. The search for an improvement in lifestyle or career prospects is  
13 not the only parameter in the choice of destination. Cultural or historical links between the  
14 two countries or geographical proximity can also play a role in the decision. This is why we  
15 decided to ~~study the migratory flow of doctors~~ explore and describe the phenomenon of  
16 migration of medical doctors between the United Kingdom and France in an attempt to  
17 identify the precise reasons for these migrations.  
18  
19  
20  
21  
22  
23  
24  
25  
26

## 27 II - MATERIALS and METHODS

28  
29  
30 We conducted a cross-sectional study on the migration of doctors between France and the  
31 United Kingdom. This study was organised in two parts: we asked doctors trained in France  
32 and those trained in the United Kingdom about the reasons behind the decision to expatriate.  
33  
34 We used official data from the Medical Councils of Britain and France to establish our list of  
35 doctors. These councils are required to create and keep an up-to-date record of all of the  
36 medical doctors authorized to practice medicine. In the first part, doctors who had trained in  
37 France before moving to the United Kingdom to practice were identified thanks to the register  
38 of the General Medical Council (GMC) in 2005. The results of this first part as well as the  
39 methods and the questionnaire used have already been published (8, 9). The second part of the  
40 study concerned British doctors registered with the French 'Conseil National de l'Ordre des  
41 Médecins' (CNOM) in 2009. In addition, the CNOM have socio-demographic data for all of  
42  
43  
44  
45  
46  
47  
48  
49  
50  
51  
52  
53  
54  
55  
56  
57  
58  
59  
60

1  
2  
3  
4  
5  
6  
7 the doctors registered, which allowed us to conduct a descriptive analysis of all of the doctors  
8 concerned and to assess the representativeness of the sample of respondents.

9  
10 Doctors who qualified before moving to either the United Kingdom or France were asked to  
11 complete a questionnaire about the reasons for their decision to migrate. The demographic  
12 characteristics and the reasons for their expatriation were gathered via a self-completed  
13 questionnaire that contained the same items for the two populations; it was based on the study  
14 by Ballard and al. published in 2004 (10).

15  
16 The questionnaire comprises various parts: a description of the professional situation, an  
17 assessment of the level of professional and personal satisfaction before and after the departure  
18 (evaluated on a scale of 1 for very dissatisfied to 5 for very satisfied), questions concerning  
19 the motivations behind the expatriation (with pre-defined options), the estimated duration of  
20 the expatriation and the likelihood of a change of nationality. The questionnaires were  
21 anonymous. They were sent through the post. Data from the questionnaires were entered  
22 anonymously into a database.  
23  
24  
25  
26  
27  
28  
29  
30  
31  
32

## 33 34 35 RESULTS

36  
37  
38  
39 The questionnaire was sent to the 264 doctors registered as French by the GMC in 2005; we  
40 received 98 responses. As 20 questionnaires were returned because the address was incorrect,  
41 the overall response rate was roughly 40% (98 out of 244). From the 86 British doctors  
42 working in France and registered with the CNOM, we received 40 responses, that is to say  
43 46.5%. As in the first study, 14 completed questionnaires were returned by British doctors  
44 who had not done all of their medical studies in the United Kingdom. These questionnaires  
45 were not taken into account for the motivation analysis. We found no significant difference  
46 (chi-squared comparison test's p-value=0.52) in the proportion of British doctors who had not  
47  
48  
49  
50  
51  
52  
53  
54  
55  
56  
57  
58  
59  
60

1  
2  
3  
4  
5  
6  
7 done all of their medical studies in the United Kingdom between our sample of respondent  
8 (33%) and the CNOM's data (39%); we therefore assume that our sample of respondents is  
9 rather representative.  
10

11  
12 Sex distribution in the two populations was well balanced (Figure 1) with a trend towards a  
13 greater proportion of women in the British expatriates (sex-ratio 0.95 for French vs. 0.85 for  
14 British doctors). The mean age was 47 years for British and 44 years for French doctors. In  
15 both populations we found a majority of women in younger doctors (less than 50 years) and a  
16 majority of men among older doctors.  
17

18  
19 The doctors who answered the questionnaires believed they were proficient in the foreign  
20 language. Only 19% of French doctors and 11% of British doctors said that they were weak in  
21 the foreign language before the expatriation. In addition, language did not seem to be an  
22 obstacle to expatriation since even those who had a low level in the foreign language did not  
23 wish to have language lessons after the expatriation.  
24

25  
26 The two populations included a wide range of specialists (Table 1). The proportion of general  
27 practitioners (GPs) was high in both groups, 48% for the French and 41% for the British  
28 expatriate doctors ~~(41%)~~. The majority of GPs were women in the two populations: 58% of  
29 French GPs and 57% of British GPs.  
30

31  
32 In the two populations, the expatriation occurred at roughly the same period in the career. The  
33 French doctors had been in practice for an average of eight years compared with nine years  
34 for the British doctors.  
35

36  
37 Before expatriation, only 32% of French doctors had worked in the public sector whereas  
38 there were 67% of British doctors. After expatriation, the majority of French doctors (68%)  
39 opted for the public sector, and the majority of British doctors (67%) remained in the public  
40 sector.  
41

42  
43  
44  
45  
46  
47  
48  
49  
50  
51  
52  
53  
54 6  
55  
56  
57  
58  
59  
60

1  
2  
3  
4  
5  
6  
7 We found three main reasons for expatriation: expatriation for personal reasons, expatriation  
8 for professional reasons and expatriation for a combination of professional and personal  
9 reasons. In both groups, the reasons were predominantly mixed (Figure 2), but were  
10 considerably different. The majority of French doctors (59%) and the majority of British  
11 doctors (65%) said they moved for professional and family reasons. For the French doctors,  
12 professional reasons were put at the forefront and were principally an increase in revenue (11)  
13 and an improvement in working conditions and better recognition with regard to both research  
14 and training. Also in this group, personal reasons were first the appeal of the British way of  
15 life and then family reasons. For the British doctors, the main professional reasons were the  
16 interest of a new position with an opportunity for career advancement and dissatisfaction with  
17 working conditions in the United Kingdom, which prevented them from reconciling their  
18 professional and personal lives, notably for those with a spouse in France. In this group the  
19 main personal reasons were family reasons followed by the appeal of the French way of life.  
20  
21 Only 12% of French doctors and 4% of British doctors moved for professional reasons alone.  
22  
23 These doctors were mainly men over 40 who were seeking an increase in revenue. Twenty-  
24 nine per cent of French doctors and 31% of British doctors moved for family reasons alone.  
25  
26 Almost all of these moves were made to join a husband or wife.  
27  
28

29  
30  
31 Overall, the doctors who returned the questionnaires were satisfied with the expatriation  
32 (mean level of satisfaction 4/5).  
33

34  
35 Before the expatriation, the proportion of doctors who were satisfied or very satisfied with  
36 their professional situation was greater in the British doctors (54%) than in the French doctors  
37 (41%) (Figure 3). After expatriation, the proportions were inverted: 84% of French doctors  
38 were satisfied or very satisfied with their new professional situation compared with 57% of  
39 British doctors. The change in the level of satisfaction for each doctor allowed us to assess the  
40 gains brought about by the expatriation. From a professional point of view, 54% of French  
41  
42  
43  
44  
45  
46  
47  
48  
49  
50  
51  
52  
53  
54  
55  
56  
57  
58  
59  
60

1  
2  
3  
4  
5  
6  
7 doctors and 50% of British doctors believed that the expatriation allowed them to obtain a  
8 more satisfying position. Nonetheless, 12% of French doctors and 19% of British doctors  
9 experienced a deterioration in satisfaction at work. From a personal point of view, the British  
10 doctors were generally satisfied. In fact, most of the British doctors planned to settle in France  
11 on a permanent basis (more than 10 years or indefinitely), even though 73% did not wish to  
12 apply for French nationality. The majority of British doctors settled in coastal areas of the  
13 south of France or in or around Paris (Figure 4).  
14  
15  
16  
17  
18  
19

## 20 21 22 DISCUSSION

23  
24  
25  
26 This study allowed us to identify the principal features of the migration of doctors between  
27 Britain and France. Among these expatriates, there are almost as many men as women, with a  
28 slight majority of women in doctors less than 50 years old and a majority of men in the older  
29 doctors. There were doctors specialized in most branches of medicine and GPs accounted for  
30 almost half of the total. The motivation for the expatriation was mainly a mixture of  
31 professional and personal reasons. For French doctors, the principal professional reasons were  
32 an increase in revenue and an improvement in working conditions, while the main personal  
33 reason was the appeal of the British way of life. For British doctors, the foremost professional  
34 reason was the interest of the new position and an opportunity for career advancement, while  
35 the main personal reason was to join another family member.  
36  
37  
38  
39  
40  
41  
42  
43  
44

45 Overall, the doctors were satisfied with their move (mean level of satisfaction 4/5). However,  
46 the reasons for the satisfaction for British doctors were not the same as those for French  
47 doctors. For British doctors the satisfaction was essentially for personal reasons whereas for  
48 French doctors it was essentially for professional reasons. In fact, after expatriation, 84% of  
49 French doctors were satisfied with their new professional situation compared with only 58%  
50  
51  
52  
53  
54  
55  
56  
57  
58  
59  
60

1  
2  
3  
4  
5  
6  
7 of British doctors. Almost 20% of British doctors experienced a deterioration in their level of  
8 satisfaction at work.

9  
10 Nonetheless, most of the British doctors planned to settle in France for a long time and in  
11 some cases definitively. Furthermore, the analysis of the distribution of British doctors around  
12 France showed that they were particularly attracted to coastal areas of the south of France and  
13

14 the Paris area, ~~which could be interpreted as follows: British doctors could be drawn to France~~  
15 ~~either to join a partner or because of the favourable climate. It cannot be inferred from the~~  
16 ~~results that British doctors settle preferably in the Cote d'Azur region because of its climate.~~  
17 The geographic distribution of doctors in France is in towns and cities (incl. Paris) and the  
18 southern regions. It is more plausible that British doctors settle where opportunities are  
19 favourable and/or where their partners live - after all the major reason for their expatriation.  
20 An interest in the architecture of Paris and/or the south of France may be another reason for  
21 migration, as could be the case for any British migrant to France.  
22  
23  
24  
25  
26  
27  
28  
29  
30  
31

Formatted: English (U.S.)

Formatted: English (U.S.)

Comment [b1]: Edited sentence

Formatted: Font: Not Bold, Not Italic, English (U.S.)

32  
33 In this study, the response rates were 40% and 40.6%, which may seem low. Nonetheless,  
34 these rates are relatively good when compared with response rates usually achieved in opinion  
35 surveys conducted among doctors which can range from 12.4% for Watson J et al. (12) to  
36 53% for Whalley et al. (13) In addition, the present study made use of official databases run  
37 by the Medical Councils of Britain and France which are required by law to guarantee the  
38 accuracy of these registers. Thanks to the official CNOM's registration data, it was possible  
39 for us to compare the characteristics of the UK doctors in our study with those on the file  
40 provided by the CNOM. This comparison allowed us to show that our sample was  
41 representative and that our estimation of the response of British doctors who moved to France  
42 was accurate. In addition, as shown by Sax L.J. et al (14), the self-questionnaire has several  
43 advantages. It reduces the risk of both memory bias and interviewer bias.

44  
45  
46  
47  
48  
49  
50  
51  
52  
53  
54  
55  
56  
57  
58  
59  
60

1  
2  
3  
4  
5  
6  
7 Another strength of this study lies in the fact that it allowed us to analyse the migration of  
8 doctors between developed countries. Indeed, most of the studies on this subject concern the  
9 migration of doctors from developing to developed countries (15). The main reasons why  
10 doctors migrate from developing to developed countries can be described by the “push and  
11 pull” concept (16-19). The term ‘push’ corresponds to factors that are inherent to the country  
12 of origin, which push workers to leave (low salaries, political instability and insecurity). In  
13 contrast, the term ‘pull’ brings together factors that are inherent to the country of destination,  
14 whether intentional or not, that attract foreign workers (better pay, better pension schemes). In  
15 this study, no clear-cut “push” factors were found, which shows that the migration of doctors  
16 between the UK and France is driven by other factors. As shown by several studies (7, 20,  
17 21), for European doctors as a whole, both the United Kingdom and France are attractive  
18 destinations. Moreover, since 2004, EU enlargement has favored the inflow of medical  
19 doctors from new member countries ((22, 23) Unlike the United Kingdom (24), France has no  
20 active policy and no advertising campaigns to recruit foreign doctors. ~~Despite~~  
21 ~~this~~ Consequently, our study shows that ~~a-substantial-number-of~~ UK doctors, who studied in  
22 the UK, ~~and~~ have moved to France, mainly move to join their partners. In addition, the level  
23 of satisfaction after the move, revealed in this study, seems to show that they were well  
24 received. It is therefore interesting to note the extent to which our results differ from those  
25 reported by Miller et al (25) concerning Australian and New-Zealand doctors who moved to  
26 the USA. The vast majority (more than 82%) of these doctors was men and most were  
27 specialists (75%) drawn by university positions. The motivations of these doctors therefore  
28 seem to be very different from those of UK and French doctors. One of the reasons for this  
29 difference could be linked to the vigorous recruitment policy in the USA reinforced by very  
30 attractive salaries. It therefore seems that for doctors working in developed countries, beyond  
31  
32  
33  
34  
35  
36  
37  
38  
39  
40  
41  
42  
43  
44  
45  
46  
47  
48  
49  
50  
51  
52

53  
54 10  
55  
56  
57  
58  
59  
60

1  
2  
3  
4  
5  
6  
7 the classical paradigm of the migration pyramid, the reasons for expatriation are related to  
8 quite specific local issues that vary from country to country.  
9

## 10 11 12 CONCLUSION 13

14  
15  
16 This study, which is the first of its kind and based on representative samples, has led to a  
17 clearer understanding of the migration of doctors between France and the United Kingdom. It  
18 showed that the motivations of the two populations concerned are quite different: French  
19 doctors are more interested in the health care system, notably the National Health Service  
20 (NHS) whereas British doctors are more interested in opportunities for career advancement, or  
21 move to join a husband or wife, or to benefit from a favourable environmental conditions,  
22 notably warmer weather in the south of France. The British health care system is very  
23 appealing to French doctors, especially GPs, for whom the NHS presents the advantages of  
24 easier management of work time, better income and better recognition with regard to both  
25 research and training. The NHS is also able to retain British doctors since very few said they  
26 left Britain for professional reasons alone, and once British doctors had settled in France, a  
27 large number said they were less satisfied with their professional life. Nonetheless, overall the  
28 doctors who returned the questionnaire were globally satisfied with their expatriation.  
29  
30  
31  
32  
33  
34  
35  
36  
37  
38  
39  
40  
41  
42  
43  
44  
45  
46  
47  
48  
49  
50  
51  
52  
53  
54  
55  
56  
57  
58  
59  
60

## References:

1. Martineau T, Decker K, Bundred P. "Brain drain" of health professionals: from rhetoric to responsible action. *Health Policy*. 2004 Oct;70(1):1-10.
2. Bundred PE, Levitt C. Medical migration: who are the real losers? *Lancet*. 2000 Jul 15;356(9225):245-6.
3. Marchal B, Kegels G. Health workforce imbalances in times of globalization: brain drain or professional mobility? *Int J Health Plann Manage*. 2003 Oct-Dec;18 Suppl 1:S89-101.
4. Mullan F. The metrics of the physician brain drain. *N Engl J Med*. 2005 Oct 27;353(17):1810-8.
5. Claudia BM, editor. Cross-country analysis of health professional mobility in Europe: the results. *Health Professional Mobility and Health Systems – Evidence from 17 European countries*; 2011.
6. Ferrera M. The 'Southern Model' of Welfare in Social Europe. *Journal of European Social Policy* 1996;6(1):17-37.
7. Wismar M, Glinos IA, Maier CB, Dussault G, Palm W, Bremner J, et al., editors. Health professional mobility and health systems: evidence from 17 European countries. *Euro Observer The Health Policy Bulletin of the European Observatory on Health Systems and Policies* 2011 Summer 2011.
8. Dobson R. Four out of five doctors who emigrate from France to UK satisfied with move. *BMJ*. 2008;337:a2708.
9. Duverne A, Carnet D, d'Athis P, Quantin C. [French doctors working in Great Britain: a study of their characteristics and motivations for migration]. *Rev Epidemiol Sante Publique*. 2008 Oct;56(5):360-73.
10. Ballard KD, Robinson SI, Laurence PB. Why do general practitioners from France choose to work in London practices? A qualitative study. *Br J Gen Pract*. 2004 Oct;54(507):747-52.
11. Samson AL. Behavior of health care provision and income of GPs: the influence of the regulation of ambulatory medicine. *Journal d'Economie Medicale*. 2011;29(5):247-69.
12. Watson J, Humphrey A, Peters-Klimm F, Hamilton W. Motivation and satisfaction in GP training: a UK cross-sectional survey. *Br J Gen Pract*. 2011 Oct;61(591):e645-9.
13. Whalley D, Bojke C, Gravelle H, Sibbald B. GP job satisfaction in view of contract reform: a national survey. *Br J Gen Pract*. 2006 Feb;56(523):87-92.
14. Sax LJ, Gilmartin SK, Bryant AN. Assessing Response Rates and Nonresponse Bias in Web and Paper Surveys. *Research in Higher Education*. 2004;4:409-32.
15. Kangasniemi M, Winters LA, Commander S. Is the medical brain drain beneficial? Evidence from overseas doctors in the UK. *Soc Sci Med*. 2007 Sep;65(5):915-23.
16. Dovlo D, editor. *The Brain Drain and Retention of Health Professionals in Africa. A case study prepared for a Regional Training Conference on: Improving Tertiary Education in Sub-Saharan Africa: Things That Work! ; 2003 September 23-25, 2003; Accra.*
17. Eastwood JB, Conroy RE, Naicker S, West PA, Tutt RC, Plange-Rhule J. Loss of health professionals from sub-Saharan Africa: the pivotal role of the UK. *Lancet*. 2005 May 28-Jun 3;365(9474):1893-900.

1  
2  
3  
4  
5  
6  
7  
8  
9  
10  
11  
12  
13  
14  
15  
16  
17  
18  
19  
20  
21  
22  
23  
24  
25  
26  
27  
28  
29  
30  
31  
32  
33  
34  
35  
36  
37  
38  
39  
40  
41  
42  
43  
44  
45  
46  
47  
48  
49  
50  
51  
52  
53  
54  
55  
56  
57  
58  
59  
60

18. Klein D, Hofmeister M, Lockyear J, Crutcher R, Fidler H. Push, pull, and plant: the personal side of physician immigration to alberta, Canada. *Fam Med.* 2009 Mar;41(3):197-201.

19. Witt J. Addressing the migration of health professionals: the role of working conditions and educational placements. *BMC Public Health.* 2009;9 Suppl 1:S7.

For peer review only

Footnotes

Contributorship statement: CQ and DC were responsible for the conception and design of this study. GLB and MR provided the data. MH, CQ, and RA analysed the data. CQ, RA and DC wrote the manuscript. MH contributed to the initial revision of the manuscript. All authors were involved in approval of the final manuscript. All authors had full access to all of the data in the study and can take responsibility for the integrity of the data and the accuracy of the data analysis. CQ is guarantor.

Competing interest: All authors have completed the Unified Competing Interest form at [www.icmje.org/coi\\_disclosure.pdf](http://www.icmje.org/coi_disclosure.pdf) (available on request from the corresponding author) and declare: no support from any organisation for the submitted work; no financial relationships with any organisations that might have an interest in the submitted work in the previous three years; no other relationships or activities that could appear to have influenced the submitted work.

Ethical approval: Not required.

Funding: This study received no specific funding.

Data sharing: there is no additional data available.

Summary:

What is already known on this subject

The main reasons why doctors migrate from developing to developed countries can be described by the “push and pull” concept

Though migration between developing and developed countries is well known, that between developed countries and especially between France and the United Kingdom is not

1  
2  
3  
4  
5  
6  
7 What this study adds

8 It is the first study to analyse both jointly and bilaterally reasons why doctors move from  
9 France to the United Kingdom or vice versa.  
10

11 The British health care system is very appealing to French doctors, especially GPs, for whom  
12 the NHS presents the advantages of easier management of work time, better income and better  
13 recognition with regard to both research and training  
14

15 British doctors who moved to France are more interested in opportunities for career  
16 advancement, or move to join a husband or wife, or to benefit from favourable environmental  
17 conditions, notably warmer weather in the south of France  
18  
19  
20  
21  
22  
23  
24  
25  
26  
27  
28  
29  
30  
31  
32  
33  
34  
35  
36  
37  
38  
39  
40  
41  
42  
43  
44  
45  
46  
47  
48  
49  
50  
51  
52  
53

54 15  
55  
56  
57  
58  
59  
60

## Comparison of British and French expatriate doctors' characteristics and motivations

Short title: Why do British and French MDs cross the Channel?

C. QUANTIN<sup>1, 2</sup>, R. ABBAS<sup>1</sup>, M. HAGI<sup>1</sup>, G. LE BRETON<sup>2</sup>, M. ROMESTAING<sup>2</sup>, D. CARNET<sup>3</sup>

1. Service de Biostatistique et Informatique Médicale, CHU de Dijon
2. INSERM U 866 Université de Bourgogne
3. Conseil National de l'Ordre des Médecins, Paris, France
4. Faculté de Médecine, Université de Bourgogne

### Corresponding author :

Professeur Catherine QUANTIN

Service de Biostatistique et Informatique Médicale

Centre Hospitalier Universitaire

BP 77908

21079 DIJON CEDEX

Tel: 33 3 80 29 36 29

Fax: 33 3 80 29 39 73

Email: [catherine.quantin@chu-dijon.fr](mailto:catherine.quantin@chu-dijon.fr)

**Key words:** Medical Emigration, Great Britain, Recruitment, Health System, France

1

1  
2  
3  
4  
5  
6  
7 ABSTRACT

8 Objective: to analyse the migration of doctors between the United Kingdom and France,  
9 in an attempt to identify the reasons for these migrations.

10  
11 Design: This was a cross-sectional study conducted using a self-completed  
12 questionnaire.

13  
14 Setting: The questionnaire was sent to all of the British doctors practicing in France and  
15 to all of the French doctors practicing in the United Kingdom.

16  
17 Participants: The doctors were identified thanks to official data of the National Medical  
18 Councils. There were 244 French doctors practicing in the United Kingdom and 86 British  
19 doctors practicing in France.

20  
21 Outcome measures: A questionnaire was specifically developed for the study to  
22 determine the reasons why doctors moved to the other country and their level of satisfaction  
23 with regard to their expatriation.

24  
25 Results: A total of 98 French doctors (out of 244) and 40 British doctors (out of 86)  
26 returned the questionnaire. The motivations of the two studied populations were different:  
27 French doctors were attracted by the conditions offered by the National Health Service,  
28 whereas British doctors were more interested in opportunities for career advancement, moved  
29 to join a husband or wife or to benefit from favourable environmental conditions. Overall, the  
30 doctors who responded considered the expatriation a satisfactory experience. After  
31 expatriation, 84% of French doctors were satisfied with their new professional situation  
32 compared with only 58% of British doctors.

33  
34 Conclusion: This study, which is the first of its kind and based on representative  
35 samples, has led to a clearer understanding of the migration of doctors between France and  
36 the United Kingdom.

37  
38  
39  
40  
41  
42  
43  
44  
45  
46  
47  
48  
49  
50  
51  
52  
53  
54 2  
55  
56  
57  
58  
59  
60

## I – INTRODUCTION

Medical migration is an important issue that needs to be understood so that it can be regulated collectively, while allowing individuals to benefit from it.

Doctors are highly qualified workers, and their migration follows known migration patterns for qualified people, often referred to as the ‘brain drain’. The principal reasons for emigration are obvious (1): improvement in quality of life (higher level of security, increase in revenue ...) and their career prospects.

Migrating doctors follow what could be called a hierarchy of wealth: they migrate towards a country that is likely to offer them a better situation than that available in their country of residence (2, 3). This phenomenon is called the migration merry-go-round or the migration pyramid. For example, Zambian doctors emigrate to South Africa, while South African doctors emigrate to the United Kingdom and British doctors emigrate to Canada, which in turn sees some of its doctors head for the United States. The United States seems to be at the summit of this pyramid; it’s the only country that has a positive balance ((4)) with regard to the migratory flow of healthcare professionals. However, medical migration is not simply the flow from developing countries to more developed countries; it also involves movement between developed countries (5-7).

The United Kingdom health system has always been, and continues to be, largely reliant on immigrants. Foreign-trained medical doctors accounted for 36.8% of all registered medical doctors in 2008, around one-quarter of whom came from the EEA ([European Economic Area](#)) and three-quarters from the rest of the world. In France, immigration of medical doctors has only a marginal impact. It does not solve the difficulties of poor geographical distribution,

1  
2  
3  
4  
5  
6  
7 which is a characteristic of the French health system as there are no obligations but only  
8 incentives to set up a practice in isolated areas.  
9

10  
11 Though migration between developing and developed countries is well known, that between  
12 developed countries is not. The search for an improvement in lifestyle or career prospects is  
13 not the only parameter in the choice of destination. Cultural or historical links between the  
14 two countries or geographical proximity can also play a role in the decision. This is why we  
15 decided to ~~study the migratory flow of doctors~~ explore and describe the phenomenon of  
16 migration of medical doctors between the United Kingdom and France in an attempt to  
17 identify the precise reasons for these migrations.  
18  
19  
20  
21  
22  
23  
24  
25  
26

## 27 II - MATERIALS and METHODS

28  
29  
30 We conducted a cross-sectional study on the migration of doctors between France and the  
31 United Kingdom. This study was organised in two parts: we asked doctors trained in France  
32 and those trained in the United Kingdom about the reasons behind the decision to expatriate.  
33  
34 We used official data from the Medical Councils of Britain and France to establish our list of  
35 doctors. These councils are required to create and keep an up-to-date record of all of the  
36 medical doctors authorized to practice medicine. In the first part, doctors who had trained in  
37 France before moving to the United Kingdom to practice were identified thanks to the register  
38 of the General Medical Council (GMC) in 2005. The results of this first part as well as the  
39 methods and the questionnaire used have already been published (8, 9). The second part of the  
40 study concerned British doctors registered with the French 'Conseil National de l'Ordre des  
41 Médecins' (CNOM) in 2009. In addition, the CNOM have socio-demographic data for all of  
42  
43  
44  
45  
46  
47  
48  
49  
50  
51  
52  
53  
54  
55  
56  
57  
58  
59  
60

1  
2  
3  
4  
5  
6  
7 the doctors registered, which allowed us to conduct a descriptive analysis of all of the doctors  
8 concerned and to assess the representativeness of the sample of respondents.

9  
10 Doctors who qualified before moving to either the United Kingdom or France were asked to  
11 complete a questionnaire about the reasons for their decision to migrate. The demographic  
12 characteristics and the reasons for their expatriation were gathered via a self-completed  
13 questionnaire that contained the same items for the two populations; it was based on the study  
14 by Ballard and al. published in 2004 (10).

15  
16 The questionnaire comprises various parts: a description of the professional situation, an  
17 assessment of the level of professional and personal satisfaction before and after the departure  
18 (evaluated on a scale of 1 for very dissatisfied to 5 for very satisfied), questions concerning  
19 the motivations behind the expatriation (with pre-defined options), the estimated duration of  
20 the expatriation and the likelihood of a change of nationality. The questionnaires were  
21 anonymous. They were sent through the post. Data from the questionnaires were entered  
22 anonymously into a database.  
23  
24  
25  
26  
27  
28  
29  
30  
31  
32

## 33 34 35 RESULTS

36  
37  
38  
39 The questionnaire was sent to the 264 doctors registered as French by the GMC in 2005; we  
40 received 98 responses. As 20 questionnaires were returned because the address was incorrect,  
41 the overall response rate was roughly 40% (98 out of 244). From the 86 British doctors  
42 working in France and registered with the CNOM, we received 40 responses, that is to say  
43 46.5%. As in the first study, 14 completed questionnaires were returned by British doctors  
44 who had not done all of their medical studies in the United Kingdom. These questionnaires  
45 were not taken into account for the motivation analysis. We found no significant difference  
46 (chi-squared comparison test's p-value=0.52) in the proportion of British doctors who had not  
47  
48  
49  
50  
51  
52  
53  
54  
55  
56  
57  
58  
59  
60

1  
2  
3  
4  
5  
6  
7  
8  
9  
10  
11  
12  
13  
14  
15  
16  
17  
18  
19  
20  
21  
22  
23  
24  
25  
26  
27  
28  
29  
30  
31  
32  
33  
34  
35  
36  
37  
38  
39  
40  
41  
42  
43  
44  
45  
46  
47  
48  
49  
50  
51  
52  
53  
54  
55  
56  
57  
58  
59  
60

done all of their medical studies in the United Kingdom between our sample of respondent (33%) and the CNOM's data (39%); we therefore assume that our sample of respondents is rather representative.

Sex distribution in the two populations was well balanced (Figure 1) with a trend towards a greater proportion of women in the British expatriates (sex-ratio 0.95 for French vs. 0.85 for British doctors). The mean age was 47 years for British and 44 years for French doctors. In both populations we found a majority of women in younger doctors (less than 50 years) and a majority of men among older doctors.

The doctors who answered the questionnaires believed they were proficient in the foreign language. Only 19% of French doctors and 11% of British doctors said that they were weak in the foreign language before the expatriation. In addition, language did not seem to be an obstacle to expatriation since even those who had a low level in the foreign language did not wish to have language lessons after the expatriation.

The two populations included a wide range of specialists (Table 1). The proportion of general practitioners (GPs) was high in both groups, 48% for the French and 41% for the British expatriate doctors ~~(41%)~~. The majority of GPs were women in the two populations: 58% of French GPs and 57% of British GPs.

In the two populations, the expatriation occurred at roughly the same period in the career. The French doctors had been in practice for an average of eight years compared with nine years for the British doctors.

Before expatriation, only 32% of French doctors had worked in the public sector whereas there were 67% of British doctors. After expatriation, the majority of French doctors (68%) opted for the public sector, and the majority of British doctors (67%) remained in the public sector.

6

1  
2  
3  
4  
5  
6  
7 We found three main reasons for expatriation: expatriation for personal reasons, expatriation  
8 for professional reasons and expatriation for a combination of professional and personal  
9 reasons. In both groups, the reasons were predominantly mixed (Figure 2), but were  
10 considerably different. The majority of French doctors (59%) and the majority of British  
11 doctors (65%) said they moved for professional and family reasons. For the French doctors,  
12 professional reasons were put at the forefront and were principally an increase in revenue (11)  
13 and an improvement in working conditions and better recognition with regard to both research  
14 and training. Also in this group, personal reasons were first the appeal of the British way of  
15 life and then family reasons. For the British doctors, the main professional reasons were the  
16 interest of a new position with an opportunity for career advancement and dissatisfaction with  
17 working conditions in the United Kingdom, which prevented them from reconciling their  
18 professional and personal lives, notably for those with a spouse in France. In this group the  
19 main personal reasons were family reasons followed by the appeal of the French way of life.  
20 Only 12% of French doctors and 4% of British doctors moved for professional reasons alone.  
21 These doctors were mainly men over 40 who were seeking an increase in revenue. Twenty-  
22 nine per cent of French doctors and 31% of British doctors moved for family reasons alone.  
23 Almost all of these moves were made to join a husband or wife.

24  
25  
26  
27  
28  
29  
30  
31  
32  
33  
34  
35  
36  
37  
38  
39  
40  
41 Overall, the doctors who returned the questionnaires were satisfied with the expatriation  
42 (mean level of satisfaction 4/5).

43  
44  
45  
46  
47  
48  
49  
50  
51  
52  
53  
54  
55  
56  
57  
58  
59  
60  
Before the expatriation, the proportion of doctors who were satisfied or very satisfied with  
their professional situation was greater in the British doctors (54%) than in the French doctors  
(41%) (Figure 3). After expatriation, the proportions were inverted: 84% of French doctors  
were satisfied or very satisfied with their new professional situation compared with 57% of  
British doctors. The change in the level of satisfaction for each doctor allowed us to assess the  
gains brought about by the expatriation. From a professional point of view, 54% of French

1  
2  
3  
4  
5  
6  
7  
8  
9  
10  
11  
12  
13  
14  
15  
16  
17  
18  
19  
20  
21  
22  
23  
24  
25  
26  
27  
28  
29  
30  
31  
32  
33  
34  
35  
36  
37  
38  
39  
40  
41  
42  
43  
44  
45  
46  
47  
48  
49  
50  
51  
52  
53  
54  
55  
56  
57  
58  
59  
60

doctors and 50% of British doctors believed that the expatriation allowed them to obtain a more satisfying position. Nonetheless, 12% of French doctors and 19% of British doctors experienced a deterioration in satisfaction at work. From a personal point of view, the British doctors were generally satisfied. In fact, most of the British doctors planned to settle in France on a permanent basis (more than 10 years or indefinitely), even though 73% did not wish to apply for French nationality. The majority of British doctors settled in coastal areas of the south of France or in or around Paris (Figure 4).

## DISCUSSION

This study allowed us to identify the principal features of the migration of doctors between Britain and France. Among these expatriates, there are almost as many men as women, with a slight majority of women in doctors less than 50 years old and a majority of men in the older doctors. There were doctors specialized in most branches of medicine and GPs accounted for almost half of the total. The motivation for the expatriation was mainly a mixture of professional and personal reasons. For French doctors, the principal professional reasons were an increase in revenue and an improvement in working conditions, while the main personal reason was the appeal of the British way of life. For British doctors, the foremost professional reason was the interest of the new position and an opportunity for career advancement, while the main personal reason was to join another family member.

Overall, the doctors were satisfied with their move (mean level of satisfaction 4/5). However, the reasons for the satisfaction for British doctors were not the same as those for French doctors. For British doctors the satisfaction was essentially for personal reasons whereas for French doctors it was essentially for professional reasons. In fact, after expatriation, 84% of French doctors were satisfied with their new professional situation compared with only 58%

1  
2  
3  
4  
5  
6  
7 of British doctors. Almost 20% of British doctors experienced a deterioration in their level of  
8 satisfaction at work.  
9

10 Nonetheless, most of the British doctors planned to settle in France for a long time and in  
11 some cases definitively. Furthermore, the analysis of the distribution of British doctors around  
12 France showed that they were particularly attracted to coastal areas of the south of France and  
13 the Paris area, ~~which could be interpreted as follows: British doctors could be drawn to France  
14 either to join a partner or because of the favourable climate. It cannot be inferred from the  
15 results that British doctors settle preferably in the Cote d'Azur region because of its climate.  
16 The geographic distribution of doctors in France is in towns and cities (incl. Paris) and the  
17 southern regions. It is more plausible that British doctors settle where opportunities are  
18 favourable and/or where their partners live - after all the major reason for their expatriation.  
19 The interest of British doctors like all British people in architectural sites both in Paris and in  
20 the south of France may be another reason for migration. The environmental expert and the  
21 quality of life may have also played an important part in their choice of migration.~~  
22  
23  
24  
25  
26  
27  
28  
29  
30  
31  
32  
33

Formatted: English (U.S.)

Formatted: English (U.S.)

Formatted: Font: Not Bold, Not Italic, English (U.S.)

Formatted: Font: Not Bold, Not Italic, English (U.S.)

34  
35 In this study, the response rates were 40% and 40.6%, which may seem low. Nonetheless,  
36 these rates are relatively good when compared with response rates usually achieved in opinion  
37 surveys conducted among doctors which can range from 12.4% for Watson J et al. (12) to  
38 53% for Whalley et al. (13) In addition, the present study made use of official databases run  
39 by the Medical Councils of Britain and France which are required by law to guarantee the  
40 accuracy of these registers. Thanks to the official CNOM's registration data, it was possible  
41 for us to compare the characteristics of the UK doctors in our study with those on the file  
42 provided by the CNOM. This comparison allowed us to show that our sample was  
43 representative and that our estimation of the response of British doctors who moved to France  
44  
45  
46  
47  
48  
49  
50  
51  
52

53  
54 9  
55  
56  
57  
58  
59  
60

1  
2  
3  
4  
5  
6  
7 was accurate. In addition, as shown by Sax L.J. et al (14), the self-questionnaire has several  
8 advantages. It reduces the risk of both memory bias and interviewer bias.  
9

10 Another strength of this study lies in the fact that it allowed us to analyse the migration of  
11 doctors between developed countries. Indeed, most of the studies on this subject concern the  
12 migration of doctors from developing to developed countries (15). The main reasons why  
13 doctors migrate from developing to developed countries can be described by the “push and  
14 pull” concept (16-19). The term ‘push’ corresponds to factors that are inherent to the country  
15 of origin, which push workers to leave (low salaries, political instability and insecurity). In  
16 contrast, the term ‘pull’ brings together factors that are inherent to the country of destination,  
17 whether intentional or not, that attract foreign workers (better pay, better pension schemes). In  
18 this study, no clear-cut “push” factors were found, which shows that the migration of doctors  
19 between the UK and France is driven by other factors. As shown by several studies (7, 20,  
20 21), for European doctors as a whole, both the United Kingdom and France are attractive  
21 destinations. Moreover, since 2004, EU enlargement has favored the inflow of medical  
22 doctors from new member countries ((22, 23) Unlike the United Kingdom (24), France has no  
23 active policy and no advertising campaigns to recruit foreign doctors. ~~Despite~~  
24 ~~this~~ Consequently, our study shows that ~~a substantial number of~~ UK doctors, who studied in  
25 the UK, and have moved to France, mainly move to join their partners. In addition, the level  
26 of satisfaction after the move, revealed in this study, seems to show that they were well  
27 received. It is therefore interesting to note the extent to which our results differ from those  
28 reported by Miller et al (25) concerning Australian and New-Zealand doctors who moved to  
29 the USA. The vast majority (more than 82%) of these doctors was men and most were  
30 specialists (75%) drawn by university positions. The motivations of these doctors therefore  
31 seem to be very different from those of UK and French doctors. One of the reasons for this  
32 difference could be linked to the vigorous recruitment policy in the USA reinforced by very  
33  
34  
35  
36  
37  
38  
39  
40  
41  
42  
43  
44  
45  
46  
47  
48  
49  
50  
51  
52  
53  
54  
55  
56  
57  
58  
59  
60

1  
2  
3  
4  
5  
6  
7 attractive salaries. It therefore seems that for doctors working in developed countries, beyond  
8  
9 the classical paradigm of the migration pyramid, the reasons for expatriation are related to  
10  
11 quite specific local issues that vary from country to country.  
12

## 13 14 CONCLUSION

15  
16  
17  
18 This study, which is the first of its kind and based on representative samples, has led to a  
19  
20 clearer understanding of the migration of doctors between France and the United Kingdom. It  
21  
22 showed that the motivations of the two populations concerned are quite different: French  
23  
24 doctors are more interested in the health care system, notably the National Health Service  
25  
26 (NHS) whereas British doctors are more interested in opportunities for career advancement, or  
27  
28 move to join a husband or wife, or to benefit from a favourable environmental conditions,  
29  
30 notably warmer weather in the south of France. The British health care system is very  
31  
32 appealing to French doctors, especially GPs, for whom the NHS presents the advantages of  
33  
34 easier management of work time, better income and better recognition with regard to both  
35  
36 research and training. The NHS is also able to retain British doctors since very few said they  
37  
38 left Britain for professional reasons alone, and once British doctors had settled in France, a  
39  
40 large number said they were less satisfied with their professional life. Nonetheless, overall the  
41  
42 doctors who returned the questionnaire were globally satisfied with their expatriation.  
43  
44  
45  
46  
47  
48  
49  
50  
51  
52  
53

## References:

1. Martineau T, Decker K, Bundred P. "Brain drain" of health professionals: from rhetoric to responsible action. *Health Policy*. 2004 Oct;70(1):1-10.
2. Bundred PE, Levitt C. Medical migration: who are the real losers? *Lancet*. 2000 Jul 15;356(9225):245-6.
3. Marchal B, Kegels G. Health workforce imbalances in times of globalization: brain drain or professional mobility? *Int J Health Plann Manage*. 2003 Oct-Dec;18 Suppl 1:S89-101.
4. Mullan F. The metrics of the physician brain drain. *N Engl J Med*. 2005 Oct 27;353(17):1810-8.
5. Claudia BM, editor. Cross-country analysis of health professional mobility in Europe: the results. *Health Professional Mobility and Health Systems – Evidence from 17 European countries*; 2011.
6. Ferrera M. The 'Southern Model' of Welfare in Social Europe. *Journal of European Social Policy* 1996;6(1):17-37.
7. Wismar M, Glinos IA, Maier CB, Dussault G, Palm W, Bremner J, et al., editors. Health professional mobility and health systems: evidence from 17 European countries. *Euro Observer The Health Policy Bulletin of the European Observatory on Health Systems and Policies* 2011 Summer 2011.
8. Dobson R. Four out of five doctors who emigrate from France to UK satisfied with move. *BMJ*. 2008;337:a2708.
9. Duverne A, Carnet D, d'Athis P, Quantin C. [French doctors working in Great Britain: a study of their characteristics and motivations for migration]. *Rev Epidemiol Sante Publique*. 2008 Oct;56(5):360-73.
10. Ballard KD, Robinson SI, Laurence PB. Why do general practitioners from France choose to work in London practices? A qualitative study. *Br J Gen Pract*. 2004 Oct;54(507):747-52.
11. Samson AL. Behavior of health care provision and income of GPs: the influence of the regulation of ambulatory medicine. *Journal d'Economie Medicale*. 2011;29(5):247-69.
12. Watson J, Humphrey A, Peters-Klimm F, Hamilton W. Motivation and satisfaction in GP training: a UK cross-sectional survey. *Br J Gen Pract*. 2011 Oct;61(591):e645-9.
13. Whalley D, Bojke C, Gravelle H, Sibbald B. GP job satisfaction in view of contract reform: a national survey. *Br J Gen Pract*. 2006 Feb;56(523):87-92.
14. Sax LJ, Gilmartin SK, Bryant AN. Assessing Response Rates and Nonresponse Bias in Web and Paper Surveys. *Research in Higher Education*. 2004;4:409-32.
15. Kangasniemi M, Winters LA, Commander S. Is the medical brain drain beneficial? Evidence from overseas doctors in the UK. *Soc Sci Med*. 2007 Sep;65(5):915-23.
16. Dovlo D, editor. *The Brain Drain and Retention of Health Professionals in Africa. A case study prepared for a Regional Training Conference on: Improving Tertiary Education in Sub-Saharan Africa: Things That Work! ; 2003 September 23-25, 2003; Accra.*
17. Eastwood JB, Conroy RE, Naicker S, West PA, Tutt RC, Plange-Rhule J. Loss of health professionals from sub-Saharan Africa: the pivotal role of the UK. *Lancet*. 2005 May 28-Jun 3;365(9474):1893-900.

18. Klein D, Hofmeister M, Lockyear J, Crutcher R, Fidler H. Push, pull, and plant: the personal side of physician immigration to alberta, Canada. *Fam Med*. 2009 Mar;41(3):197-201.
19. Witt J. Addressing the migration of health professionals: the role of working conditions and educational placements. *BMC Public Health*. 2009;9 Suppl 1:S7.

For peer review only

## Footnotes

Contributorship statement: CQ and DC were responsible for the conception and design of this study. GLB and MR provided the data. MH, CQ, and RA analysed the data. CQ, RA and DC wrote the manuscript. MH contributed to the initial revision of the manuscript. All authors were involved in approval of the final manuscript. All authors had full access to all of the data in the study and can take responsibility for the integrity of the data and the accuracy of the data analysis. CQ is guarantor.

Competing interest: All authors have completed the Unified Competing Interest form at [www.icmje.org/coi\\_disclosure.pdf](http://www.icmje.org/coi_disclosure.pdf) (available on request from the corresponding author) and declare: no support from any organisation for the submitted work; no financial relationships with any organisations that might have an interest in the submitted work in the previous three years; no other relationships or activities that could appear to have influenced the submitted work.

Ethical approval: Not required.

Funding: This study received no specific funding.

Data sharing: there is no additional data available.

## Summary:

What is already known on this subject

The main reasons why doctors migrate from developing to developed countries can be described by the “push and pull” concept

Though migration between developing and developed countries is well known, that between developed countries and especially between France and the United Kingdom is not

1  
2  
3  
4  
5  
6  
7 What this study adds

8 It is the first study to analyse both jointly and bilaterally reasons why doctors move from  
9 France to the United Kingdom or vice versa.  
10

11 The British health care system is very appealing to French doctors, especially GPs, for whom  
12 the NHS presents the advantages of easier management of work time, better income and better  
13 recognition with regard to both research and training  
14

15 British doctors who moved to France are more interested in opportunities for career  
16 advancement, or move to join a husband or wife, or to benefit from favourable environmental  
17 conditions, notably warmer weather in the south of France  
18  
19  
20  
21  
22  
23  
24  
25  
26  
27  
28  
29  
30  
31  
32  
33  
34  
35  
36  
37  
38  
39  
40  
41  
42  
43  
44  
45  
46  
47  
48  
49  
50  
51  
52  
53

54 15  
55  
56  
57  
58  
59  
60

1  
2  
3  
4  
5  
6  
7  
8  
9  
10  
11  
12  
13  
14  
15  
16  
17  
18  
19  
20  
21  
22  
23  
24  
25  
26  
27  
28  
29  
30  
31  
32  
33  
34  
35  
36  
37  
38  
39  
40  
41  
42  
43  
44  
45  
46  
47  
48  
49  
50  
51  
52  
53  
54  
55  
56  
57  
58  
59  
60

Legends

Figure 1. Age pyramid

Figure 2. Motivation for expatriation in French and British doctors.

Figure 3. Level of satisfaction with professional life before and after expatriation

Figure 4. Geographical distribution of British doctors with a steady medical practice

For peer review only

|                    | French expatriate<br>doctors in Great Britain<br>(percentage) | British expatriate doctors<br>in France<br>(percentage) |
|--------------------|---------------------------------------------------------------|---------------------------------------------------------|
| GPs                | 48                                                            | 60                                                      |
| Medical speciality | 22                                                            | 14                                                      |
| Psychiatrist       | 6                                                             | 9                                                       |
| Anaesthetist       | 9                                                             | 7                                                       |
| Surgical specialty | 7                                                             | 4                                                       |
| Paediatrician      | 3                                                             | 1                                                       |
| OB-GYN             | 1                                                             | 1                                                       |
| Others             | 4                                                             | 4                                                       |
| Total              | 100%                                                          | 100%                                                    |

Table 1. Distribution of doctors according to medical specialty.

1  
2  
3  
4  
5  
6  
7  
8  
9  
10  
11  
12  
13  
14  
15  
16  
17  
18  
19  
20  
21  
22  
23  
24  
25  
26  
27  
28  
29  
30  
31  
32  
33  
34  
35  
36  
37  
38  
39  
40  
41  
42  
43  
44  
45  
46  
47  
48  
49  
50  
51  
52  
53  
54  
55  
56  
57  
58  
59  
60



209x297mm (150 x 150 DPI)

1  
2  
3  
4  
5  
6  
7  
8  
9  
10  
11  
12  
13  
14  
15  
16  
17  
18  
19  
20  
21  
22  
23  
24  
25  
26  
27  
28  
29  
30  
31  
32  
33  
34  
35  
36  
37  
38  
39  
40  
41  
42  
43  
44  
45  
46  
47  
48  
49  
50  
51  
52  
53  
54  
55  
56  
57  
58  
59  
60



209x297mm (150 x 150 DPI)

1  
2  
3  
4  
5  
6  
7  
8  
9  
10  
11  
12  
13  
14  
15  
16  
17  
18  
19  
20  
21  
22  
23  
24  
25  
26  
27  
28  
29  
30  
31  
32  
33  
34  
35  
36  
37  
38  
39  
40  
41  
42  
43  
44  
45  
46  
47  
48  
49  
50  
51  
52  
53  
54  
55  
56  
57  
58  
59  
60



209x297mm (150 x 150 DPI)

1  
2  
3  
4  
5  
6  
7  
8  
9  
10  
11  
12  
13  
14  
15  
16  
17  
18  
19  
20  
21  
22  
23  
24  
25  
26  
27  
28  
29  
30  
31  
32  
33  
34  
35  
36  
37  
38  
39  
40  
41  
42  
43  
44  
45  
46  
47  
48  
49  
50  
51  
52  
53  
54  
55  
56  
57  
58  
59  
60



222x128mm (96 x 96 DPI)

review only

1  
2  
3 Contributorship statement: CQ and DC were responsible for the conception and design of this  
4  
5 study. GLB and MR provided the data. MH, CQ, and RA analysed the data. CQ, RA and DC  
6  
7 wrote the manuscript. MH contributed to the initial revision of the manuscript. All authors  
8  
9 were involved in approval of the final manuscript. All authors had full access to all of the data  
10  
11 in the study and can take responsibility for the integrity of the data and the accuracy of the  
12  
13 data analysis. CQ is guarantor.  
14  
15  
16  
17  
18  
19  
20  
21  
22  
23  
24  
25  
26  
27  
28  
29  
30  
31  
32  
33  
34  
35  
36  
37  
38  
39  
40  
41  
42  
43  
44  
45  
46  
47  
48  
49  
50  
51  
52  
53  
54  
55  
56  
57  
58  
59  
60

1  
2  
3 Data sharing: there is no additional data available.  
4  
5  
6  
7  
8  
9  
10  
11  
12  
13  
14  
15  
16  
17  
18  
19  
20  
21  
22  
23  
24  
25  
26  
27  
28  
29  
30  
31  
32  
33  
34  
35  
36  
37  
38  
39  
40  
41  
42  
43  
44  
45  
46  
47  
48  
49  
50  
51  
52  
53  
54  
55  
56  
57  
58  
59  
60

For peer review only

1  
2  
3  
4  
5  
6  
7  
8  
9  
10  
11  
12  
13  
14  
15  
16  
17  
18  
19  
20  
21  
22  
23  
24  
25  
26  
27  
28  
29  
30  
31  
32  
33  
34  
35  
36  
37  
38  
39  
40  
41  
42  
43  
44  
45  
46  
47  
48  
49  
50  
51  
52  
53  
54  
55  
56  
57  
58  
59  
60

Funding: This study received no specific funding.

For peer review only
